# Supplementary material for: The Urban-Rural Gradient In Asthma: A Population-Based Study in Northern Europe
Source: Int J Environ Res Public Health. 2015 Dec 30;13(1):93. doi: 10.3390/ijerph13010093 (PMC4730484; doi:10.3390/ijerph13010093)
Supplement: Supplementary File 1 [file ijerph-13-00093-s001.xlsx]

## Sheet: Table S1
Table S1: Characteristics of the study population according to centre
		Aarhus (DK)	Reykjavik (IS)	Bergen (NO)	Gothenburg (SE)	Umeaa (SE)	Uppsala (SE)	Tartu (EE)	Study population	All eligible *
Subjects, N		1,952	1,634	1,852	1,446	1,654	1,689	894	11,123	12,441
Age in 2011, mean ± SD		52.9 ± 67.0	53.9 ± 6.9	52.5 ± 6.78	53.3 ± 7.2	53.6 ± 7.4	53.5 ± 7.3	51.2 ± 7.0	53.1 ± 7.1	53.0 ± 7.1
Sex, N (%F)		1,030 (53%)	904 (55%)	953 (51%)	782 (54%)	880 (53%)	913 (54%)	507 (57%)	5,969 (54%)	6,612 (53%)
Smoking status
	Current smoker, N (%)	520 (27%)	399 (24%)	564 (30%)	336 (23%)	274 (17%)	258 (15%)	251 (28%)	2,602 (23%)	2,757 (14%)
	Ex-smoker, N (%)	444 (23%)	455 (28%)	444 (24%)	372 (26%)	410 (25%)	427 (25%)	162 (18%)	2,714 (24%)	2,842 (23%)
	Never smokers, N (%)	793 (41%)	563 (34%)	655 (35%)	627 (43%)	892 (54%)	944 (56%)	409 (46%)	4,883 (44%)	5,061 (41%)
Age at smoke start, mean ± SD		16.8 ± 3.9	17.6 ± 4.4	17.5 ± 4.3	16.8 ± 4.3	16.9 ± 4.5	17.0 ± 4.4	19.4 ± 4.8	17.3 ± 4.4	17.3 ± 4.4
	Missing, N (%)
Parental smoking:
	No parents smoke, N (%)	345 (18%)	467 (29%)	541 (29%)	475 (33%)	687 (42%)	659 (39%)	360 (40%)	3,534 (32%)	3,976 (32%)
	One parent smoke, N (%)	755 (39%)	622 (38%)	724 (39%)	530 (37%)	561 (34%)	569 (34%)	410 (46%)	4,171 (38%)	4,637 (37%)
	Both parents smoke, N (%)	803 (41%)	476 (29%)	547 (30%)	385 (27%)	345 (21%)	399 (24%)	64 (7%)	3,019 (27%)	3,343 (27%)
	Don't know, N (%)	49 (3%)	69 (4%)	40 (2%)	56 (4%)	61 (4%)	62 (4%)	62 (7%)	399 (4%)	462 (4%)
	Missing (%)	1 (0.06%)	0 (0%)	2 (0.11%)	3 (0.10%)	11 (0,29%)		6 (0.31%)			OBS på decimaler ikke giver 100!
Body silhouette at 8y
	1-3 (lean), N (%)	1,617 (83%)	1,334 (82%)	1,536 (83%)	1,209 (84%)	1,313 (79%)	1,329 (79%)	746 (82%)	9,084 (82%)	9,743 (78%)
	4-6 (normal), N (%)	312 (16%)	273 (17%)	293 (16%)	218 (15%)	319 (19%)	334 (20%)	138 (15%)	1,887 (17%)	1,996 (16%)
	7-9 (obese), N (%)	23 (1%)	27 (2%)	23 (1%)	19 (1%)	22 (1%)	26 (2%)	12 (1%)	152 (1%)	159 (1%)
Parental asthma
	Mother, N (%)	159 (8%)	150 (9%)	172 (9%)	94 (6%)	131 (8%)	138 (8%)	54 (6%)	898 (8%)	1,021 (8%)
	Father, N (%)	98 (5%)	104 (6%)	90 (5%)	71 (5%)	83 (5%)	74 (4%)	29 (3%)	549 (5%)	615 (5%)
	No parental asthma, N (%)	1,683 (86%)	1,369 (84%)	1,582 (85%)	1,271 (88%)	1,428 (86%)	1,471 (87%)	808 (90%)	9,612 (86%)	9,292 (75%)
	Both parents asthma, N (%)	12 (1%)	11 (1%)	8 (1%)	10 (1%)	12 (1%)	6 (1%)	5 (1%)	64 (1%)	70 (1%)
	Missing, N (%)
Hay fever
	Yes, N (%)	496 (26%)	388 (24%)	432 (23%)	337 (23%)	391 (24%)	425 (25%)	228 (25%)	2,697 (24%)	2,998 (24%)
	Missing, N (%)	32 (2%)	7 (2%)	54 (3%)	66 (2%)	74 (2%)		44 (2%)
* = Numbers may vary due to missing data

## Sheet: Table S2
Table S2: Cox regression analyses on wheeze for all and stratified by sex and smoking status presented as HR (95% CI)
		Inner city	Suburb of city	Small town	Village in rural area	Farm without livestock	Farm with livestock	HR for urban-rural trend "	P for urban-rural trend
All
	Crude	1	0.92 (0.81-1.04)	0.98 (0.86-1.12)	0.81 (0.70-0.94)	0.92 (0.68-1.24)	0.74 (0.63-0.87)	0.95 (0.92-0.97)	<0.01
	Adjusted 1 (uden parental astma)
	Adjusted 1 °	1	0.85 (0.75-0.97)	0.94 (0.82-1.07)	0.85 (0.73-1.00)	0.85 (0.63-1.15)	0.82 (0.70-0.96)	0.97 (0.94-1.01)	0.06
	Adjusted 2 *	1	0.86 (0.76-0.98)	0.96 (0.84-1.10)	0.87 (0.74-1.02)	0.88 (0.65-1.20)	0.87 (0.73-1.02)	0.98 (0.95-1.01)	0.22
Men
	Crude	1	0.90 (0.75-1.08)	1.01 (0.83-1.22)	0.83 (0.66-1.04)	1.16 (0.78-1.71)	0.84 (0.67-1.05)	0.98 (0.93-1.02)	0.23
	Adjusted 1 °	1	0.83 (0.69-1.00)	0.98 (0.81-1.19)	0.93 (0.73-1.16)	1.10 (0.74-1.63)	0.97 (0.76-1.22)	1.01 (0.97-1.05)	0.58
	Adjusted 2 *	1	0.83 (0.69-1.00)	1.00 (0.82-1.21)	0.92 (0.73-1.17)	1.13 (0.76-1.68)	1.02 (0.80-1.28)	1.02 (0.98-1.06)	0.35
Women
	Crude	1	0.93 (0.78-1.12)	0.95 (0.79-1.14)	0.80 (0.65-0.99)	0.69 (0.42-1.12)	0.67 (0.54-0.84)	0.92 (0.89-0.96)	<0.01
	Adjusted 1 °	1	0.86 (0.72-1.03)	0.89 (0.73-1.07)	0.79 (0.63-0.98)	0.65 (0.39-1.05)	0.72 (0.57-0.90)	0.94 (0.90-0.98)	<0.01
	Adjusted 2 *	1	0.88 (0.74-1.06)	0.92 (0.76-1.11)	0.82 (0.66-1.02)	0.67 (0.41-1.10)	0.76 (0.61-0.96)	0.95 (0.91-0.99)	0.02
Smoking
	Crude	1	0.99 (0.84-1.17)	0.96 (0.80-1.15)	0.82 (0.66-1.01)	0.91 (0.60-1.39)	0.74 (0.59-0.92)	0.93 (0.90-0.97)	<0.01
	Adjusted 1 °	1	0.90 (0.76-1.06)	0.91 (0.76-1.09)	0.85 (0.69-1.06)	0.83 (0.54-1.27)	0.79 (0.63-0.99)	0.96 (0.92-1.00)	0.05
	Adjusted 2 *	1	0.90 (0.76-1.06)	0.92 (0.76-1.10)	0.86 (0.70-1.08)	0.83 (0.54-1.27)	0.82 (0.65-1.02)	0.96 (0.93-1.01)	0.09
Not smoking
	Crude	1	0.85 (0.70-1.04)	1.07 (0.88-1.30)	0.87 (0.69-1.10)	0.98 (0.63-1.52)	0.83 (0.65-1.04)	0.98 (0.93-1.02)	0.27
	Adjusted 1 °	1	0.80 (0.65-0.97)	1.00 (0.82-1.22)	0.87 (0.68-1.09)	0.90 (0.58-1.41)	0.90 (0.71-1.15)	1.00 (0.96-1.04)	0.91
	Adjusted 2 *	1	0.80 (0.65-0.98)	1.01 (0.83-1.23)	0.87 (0.69-1.10)	0.91 (0.58-1.41)	0.92 (0.72-1.17)	1.01 (0.96-1.05)	0.95
° = Adjusted for sex, age, centre and parental asthma
* = Adjusted for sex, age, centre, parental asthma, smoking, bodyshape at 8y and parental smoking in childhood
" = comparing two adjacent levels of urbanisation

## Sheet: Table S3
Table S3: Cox regression analyses on wheeze stratified by time of onset and phenotype of asthma presented as HR (95% CI)
Allergic asthma was defined as presence of both hay fever and asthma.
		Inner city	Suburb of city	Small town	Village in rural area	Farm without livestock	Farm with livestock	HR for urban-rural trend "	P for urban-rural trend
Early onset (≤10y)
	Crude	1	0.93 (0.64-1.36)	1.41 (0.97-2.04)	1.26 (0.83-1.91)	1.86 (0.96-3.63)	0.87 (0.55-1.39)	1.02 (0.95-1.10)	0.64
	Adjusted 1 °	1	0.91 (0.62-1.34)	1.31 (0.90-1.90)	1.17 (0.76-1.80)	1.64 (0.84-3.22)	0.90 (0.56-1.45)	1.02 (0.94-1.10)	0.67
	Adjusted 2 *	1	0.90 (0.61-1.32)	1.30 (0.90-1.90)	1.15 (0.76-1.78)	1.65 (0.84-3.23)	0.89 (0.55-1.43)	1.02 (0.94-1.10)	0.70
Late onset (>10y)
	Crude	1	0.92 (0.80-1.05)	0.92 (0.80-1.06)	0.76 (0.64-0.90)	0.79 (0.56-1.11)	0.73 (0.61-0.86)	0.94 (0.91-0.97)	<0.01
	Adjusted 1 °	1	0.84 (0.73-0.97)	0.89 (0.77-1.03)	0.81 (0.68-0.97)	0.74 (0.52-1.04)	0.81 (0.68-0.96)	0.96 (0.93-1.00)	0.03
	Adjusted 2 *	1	0.86 (0.75-0.98)	0.92 (0.80-1.06)	0.83 (0.70-0.99)	0.77 (0.55-1.09)	0.86 (0.72-1.02)	0.98 (0.95-1.01)	0.14
Allergic
	Crude	1	0.82 (0.67-1.00)	0.95 (0.76-1.16)	0.90 (0.71-1.13)	0.85 (0.51-1.41)	0.90 (0.71-1.16)	0.99 (0.95-1.04)	0.81
	Adjusted 1 °	1	0.79 (0.64-0.96)	0.89 (0.72-1.09)	0.84 (0.66-1.08)	0.89 (0.53-1.50)	0.94 (0.73-1.22)	1.00 (0.95-1.05)	0.99
	Adjusted 2 *	1	0.78 (0.64-0.96)	0.89 (0.73-1.10)	0.84 (0.65-1.07)	0.90 (0.53-1.51)	0.95 (0.73-1.23)	1.00 (0.95-1.05)	0.96
Non-allergic
	Crude	1	1.03 (0.86-1.22)	1.02 (0.85-1.22)	0.79 (0.64-0.97)	1.05 (0.71-1.53)	0.74 (0.60-0.91)	0.93 (0.90-0.97)	<0.01
	Adjusted 1 °	1	0.95 (0.80-1.12)	1.00 (0.84-1.20)	0.91 (0.74-1.14)	0.95 (0.65-1.40)	0.86 (0.69-1.07)	0.97 (0.93-1.03)	0.20
	Adjusted 2 *	1	0.97 (0.81-1.15)	1.05 (0.87-1.26)	0.95 (0.76-1.17)	1.02 (0.70-1.51)	0.94 (0.76-1.17)	0.99 (0.95-1.03)	0.70
° = Adjusted for sex, age, centre and parental asthma
* = Adjusted for sex, age, centre, parental asthma, smoking, bodyshape at 8y and parental smoking in childhood
" = comparing two adjacent levels of urbanisation
